# Supplementary material
Source: PubMed Central journal article supplement (PMC5400059)
Supplement: NIHMS72249-supplement-Supplemental_Digital_Content.pdf [file NIHMS72249-supplement-Supplemental_Digital_Content.pdf]

## **Supplemental Digital Content**

### **Ambient Air Pollution-Related Mortality in Dairy Cattle: Does It Corroborate Human Findings?**

Bianca Cox, Antonio Gasparri, Boudewijn Catry, Frans Fierens, Jaco Vangronsveld, Tim S Nawrot

#### **Table of Contents**

eTABLE 1.....p. 2

eTABLE 2.....p. 3

**eTABLE 1.** Cumulative (Lag 0–25) Effects of Air Pollution on Dairy Cow Mortality, Belgium 2006-2009, for the Total Study Period (Main Analysis) and Excluding the Bluetongue Epidemics (August-December 2006 and July-December 2007), and Using a Natural Cubic Spline with 6 Degrees of Freedom (Main Analysis) and an Unconstrained Distributed Lag to Model the Lag Structure. Estimates Represent the Percent Change in Dairy Cow Mortality for a 10  $\mu\text{g}/\text{m}^3$  Increase in Air Pollutant Concentration.

| Season | Exposure         | Percent Change (95% CI) |                  |                                |                 |
|--------|------------------|-------------------------|------------------|--------------------------------|-----------------|
|        |                  | Total Study Period      |                  | Excluding Bluetongue Epidemics |                 |
|        |                  | Natural Spline          | Unconstrained    | Natural Spline                 | Unconstrained   |
| Warm   | O <sub>3</sub>   | 3.0 (0.2, 6.0)          | 3.1 (0.2, 6.1)   | 3.1 (-0.1, 6.3)                | 3.3 (0.1, 6.6)  |
|        | PM <sub>10</sub> | 3.2 (-0.6, 7.2)         | 3.7 (-0.2, 7.9)  | 4.0 (-0.3, 8.3)                | 4.2 (-0.2, 8.8) |
|        | NO <sub>2</sub>  | 1.4 (-4.9, 8.2)         | 1.8 (-4.8, 8.8)  | 3.6 (-3.4, 11)                 | 3.9 (-3.3, 12)  |
| Cold   | O <sub>3</sub>   | 4.6 (2.2, 7.0)          | 4.0 (1.7, 6.5)   | 4.4 (1.8, 7.1)                 | 3.6 (0.9, 6.3)  |
|        | PM <sub>10</sub> | -0.5 (-3.1, 2.2)        | 0.6 (-2.1, 3.4)  | 1.5 (-1.6, 4.7)                | 3.2 (0.0, 6.5)  |
|        | NO <sub>2</sub>  | -4.0 (-8.4, 0.6)        | -2.7 (-7.2, 2.1) | -1.8 (-6.6, 3.3)               | 0.0 (-5.0, 5.3) |

**eTABLE 2.** Cumulative (Lag 0–25) Effects of Air Pollution on Dairy Cow Mortality, Belgium 2006-2009, Using Different Specifications for the Temperature Cross-basis. Estimates Represent the Percent Change in Dairy Cow Mortality for a 10  $\mu\text{g}/\text{m}^3$  Increase in Air Pollutant Concentration. The Models Used in the Main Analysis Are Shown in Bold.

| Exposure         | Temperature         |                     | AIC             | Percent Change (95% CI) |                         |
|------------------|---------------------|---------------------|-----------------|-------------------------|-------------------------|
|                  | Var Df <sup>a</sup> | Lag Df <sup>b</sup> |                 | Warm Season             | Cold Season             |
| O <sub>3</sub>   | 3                   | 6                   | 257123.0        | 3.1 (0.4, 5.9)          | 5.0 (2.8, 7.2)          |
|                  | <b>5</b>            | <b>6</b>            | <b>257127.5</b> | <b>3.0 (0.2, 6.0)</b>   | <b>4.6 (2.2, 7.0)</b>   |
|                  | 7                   | 6                   | 257121.7        | 3.6 (0.6, 6.7)          | 4.9 (2.4, 7.5)          |
|                  | 5                   | 3                   | 257143.4        | 3.7 (0.8, 6.6)          | 4.9 (2.5, 7.3)          |
|                  | 5                   | 5                   | 257128.1        | 3.0 (0.1, 5.9)          | 4.5 (2.2, 6.9)          |
|                  | 5                   | 7                   | 257112.1        | 3.1 (0.2, 6.0)          | 4.6 (2.2, 7.0)          |
| PM <sub>10</sub> | 3                   | 6                   | 257153.5        | 3.7 (-0.1, 7.7)         | -1.2 (-3.7, 1.4)        |
|                  | <b>5</b>            | <b>6</b>            | <b>257154.2</b> | <b>3.2 (-0.6, 7.2)</b>  | <b>-0.5 (-3.1, 2.2)</b> |
|                  | 7                   | 6                   | 257149.7        | 3.8 (-0.2, 7.9)         | -0.4 (-3.1, 2.4)        |
|                  | 5                   | 3                   | 257175.8        | 2.6 (-1.2, 6.5)         | -0.3 (-2.9, 2.4)        |
|                  | 5                   | 5                   | 257160.4        | 3.0 (-0.8, 7.0)         | -0.4 (-3.0, 2.3)        |
|                  | 5                   | 7                   | 257137.3        | 3.2 (-0.7, 7.1)         | -0.5 (-3.1, 2.2)        |
| NO <sub>2</sub>  | 3                   | 6                   | 257111.9        | 1.7 (-4.6, 8.4)         | -5.3 (-9.5, -0.8)       |
|                  | <b>5</b>            | <b>6</b>            | <b>257115.5</b> | <b>1.4 (-4.9, 8.2)</b>  | <b>-4.0 (-8.4, 0.6)</b> |
|                  | 7                   | 6                   | 257108.1        | 2.4 (-4.3, 9.6)         | -3.3 (-7.9, 1.4)        |
|                  | 5                   | 3                   | 257142.9        | 0.6 (-5.6, 7.3)         | -4.7 (-9.0, -0.1)       |
|                  | 5                   | 5                   | 257128.3        | 1.2 (-5.1, 8.0)         | -4.0 (-8.4, 0.6)        |
|                  | 5                   | 7                   | 257098.7        | 1.6 (-4.8, 8.3)         | -3.9 (-8.3, 0.7)        |

<sup>a</sup> Degrees of Freedom for the Temperature-Response Function

<sup>b</sup> Degrees of Freedom for the Lag-Response Function
